# Supplementary material for: Utilization of Cyanoacetohydrazide and Oxadiazolyl Acetonitrile in the Synthesis of Some New Cytotoxic Heterocyclic Compounds
Source: MDPI journal article supplement (doi:10.3390/molecules21020155), 2016-01-29
Supplement: s1 [file s1]

# Supplementary Materials: Utilization of Cyanoacetohydrazide and Oxadiazolyl Acetonitrile in Synthesis of Some New Cytotoxic Heterocyclic Compounds

Soheir A. Shaker and Magda I. Marzouk

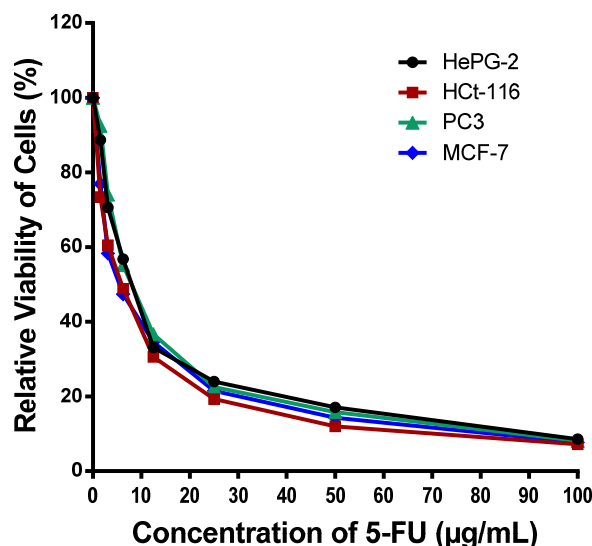

Figure S1. Relative viability of cells (%) against concentration of 5-FU.

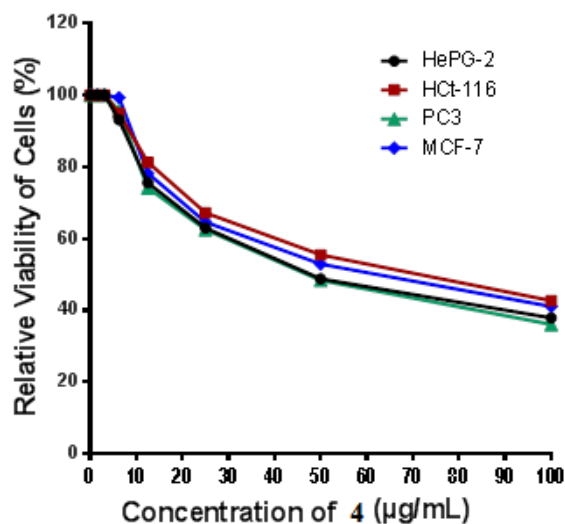

Figure S2. Relative viability of cells (%) against concentration of compound 4.

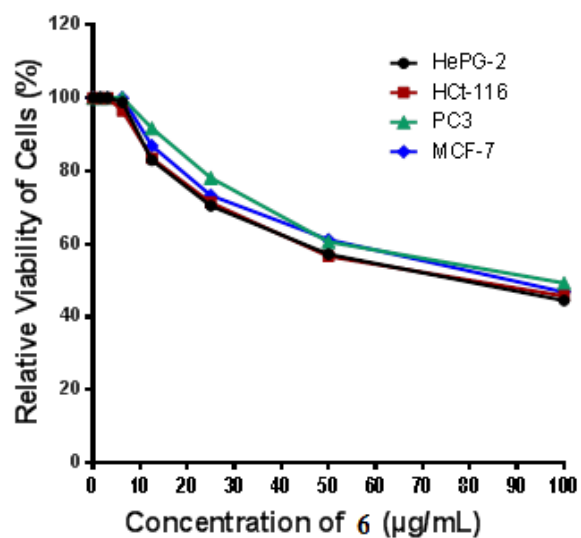

Figure S3. Relative viability of cells (%) against concentration of compound 6.

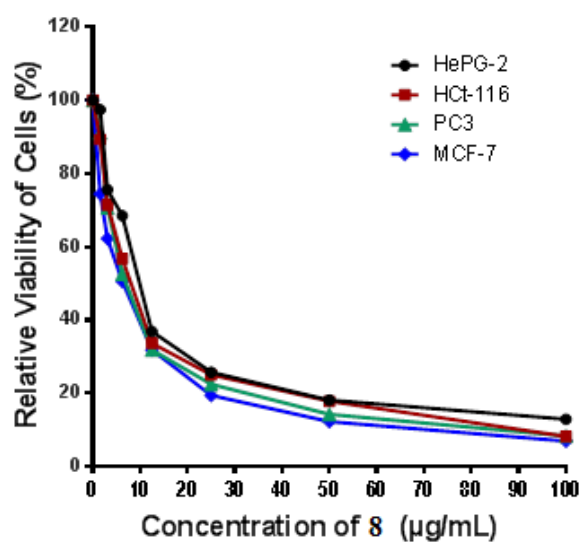

Figure S4. Relative viability of cells (%) against concentration of compound 8.

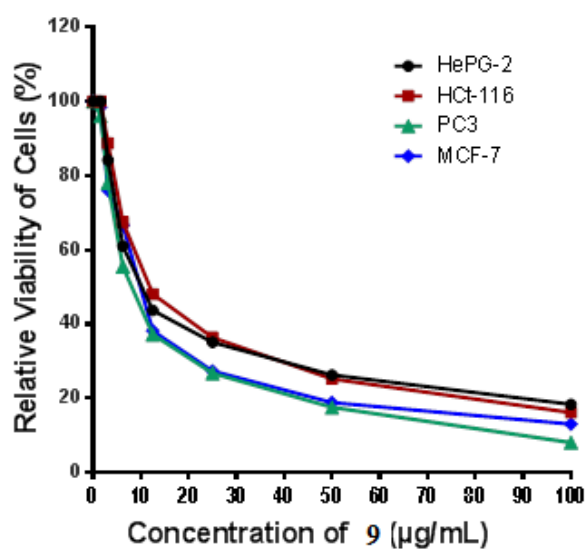

Figure S5. Relative viability of cells (%) against concentration of compound 9.

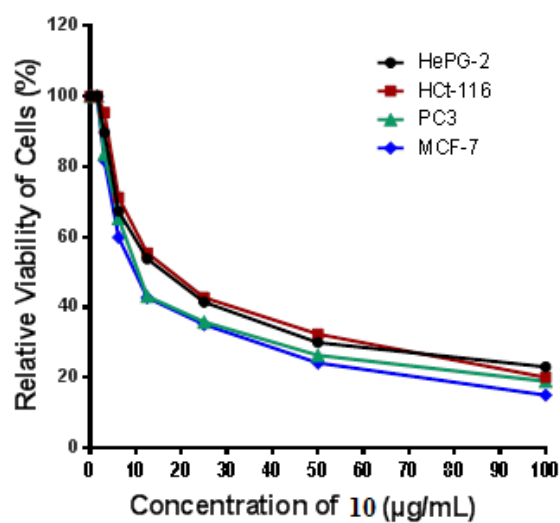

Figure S6. Relative viability of cells (%) against concentration of compound 10.

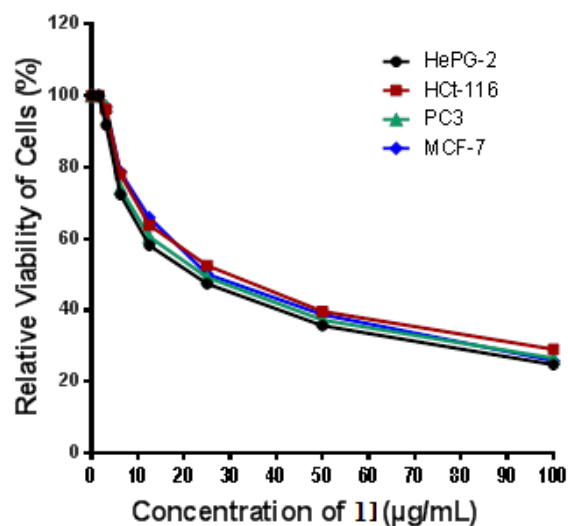

Figure S7. Relative viability of cells (%) against concentration of compound 11.

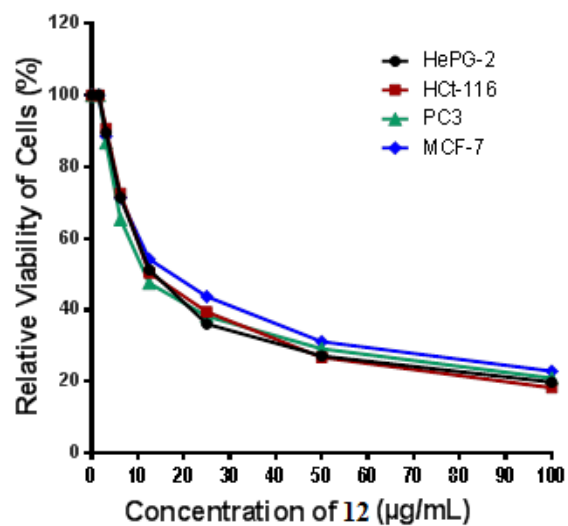

Figure S8. Relative viability of cells (%) against concentration of compound 12.

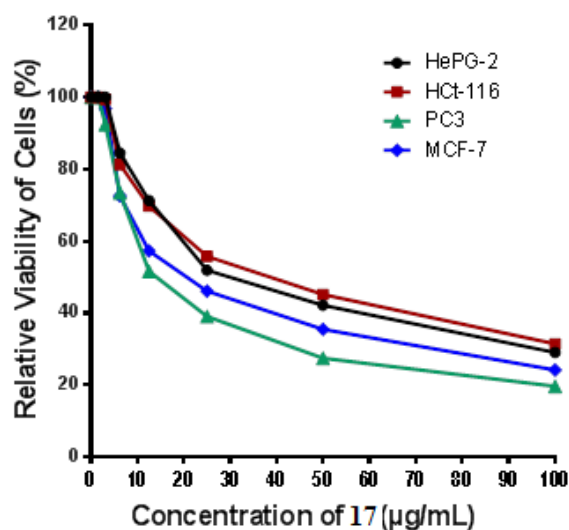

Figure S9. Relative viability of cells (%) against concentration of compound 17.

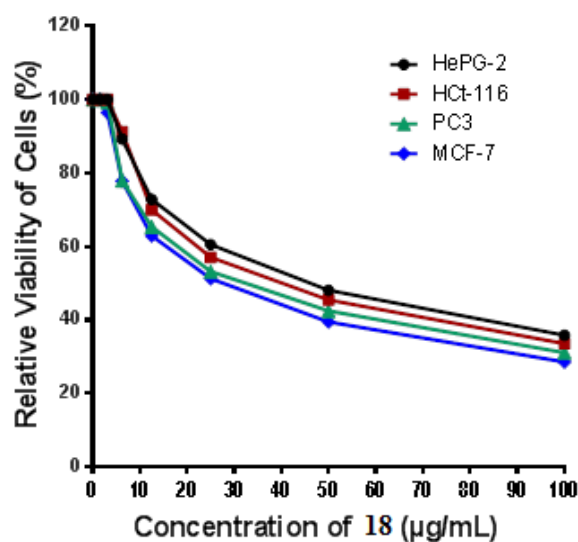

Figure S10. Relative viability of cells (%) against concentration of compound 18.

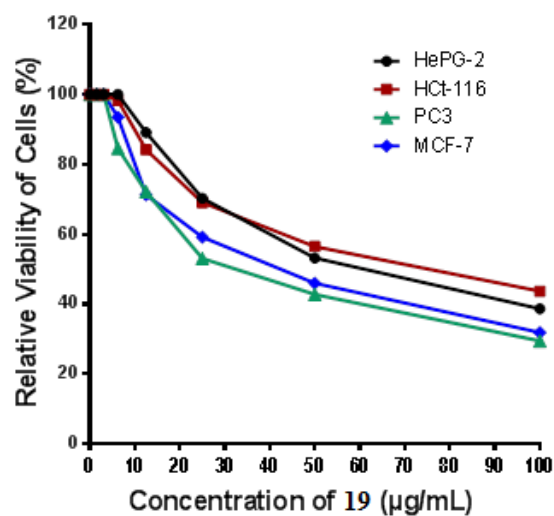

Figure S11. Relative viability of cells (%) against concentration of compound 19.

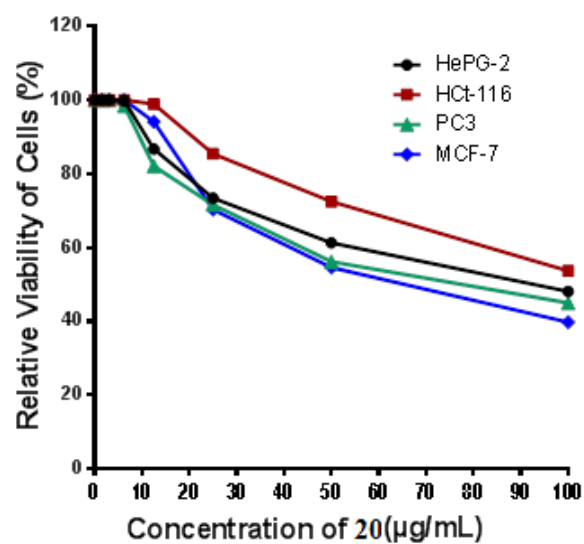

Figure S12. Relative viability of cells (%) against concentration of compound 20.

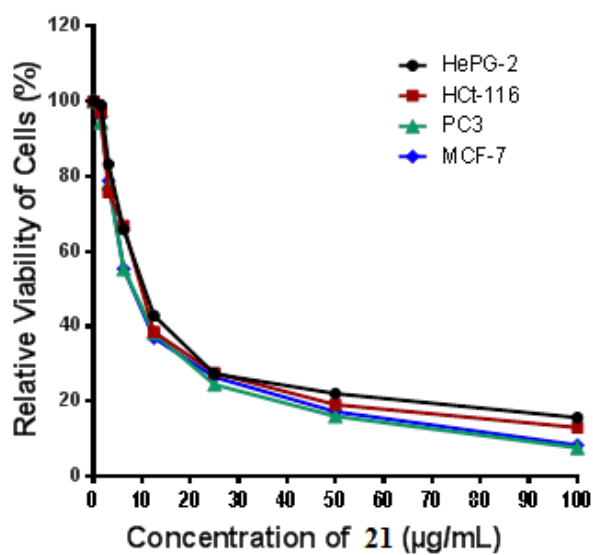

Figure S13. Relative viability of cells (%) against concentration of compound 21.
